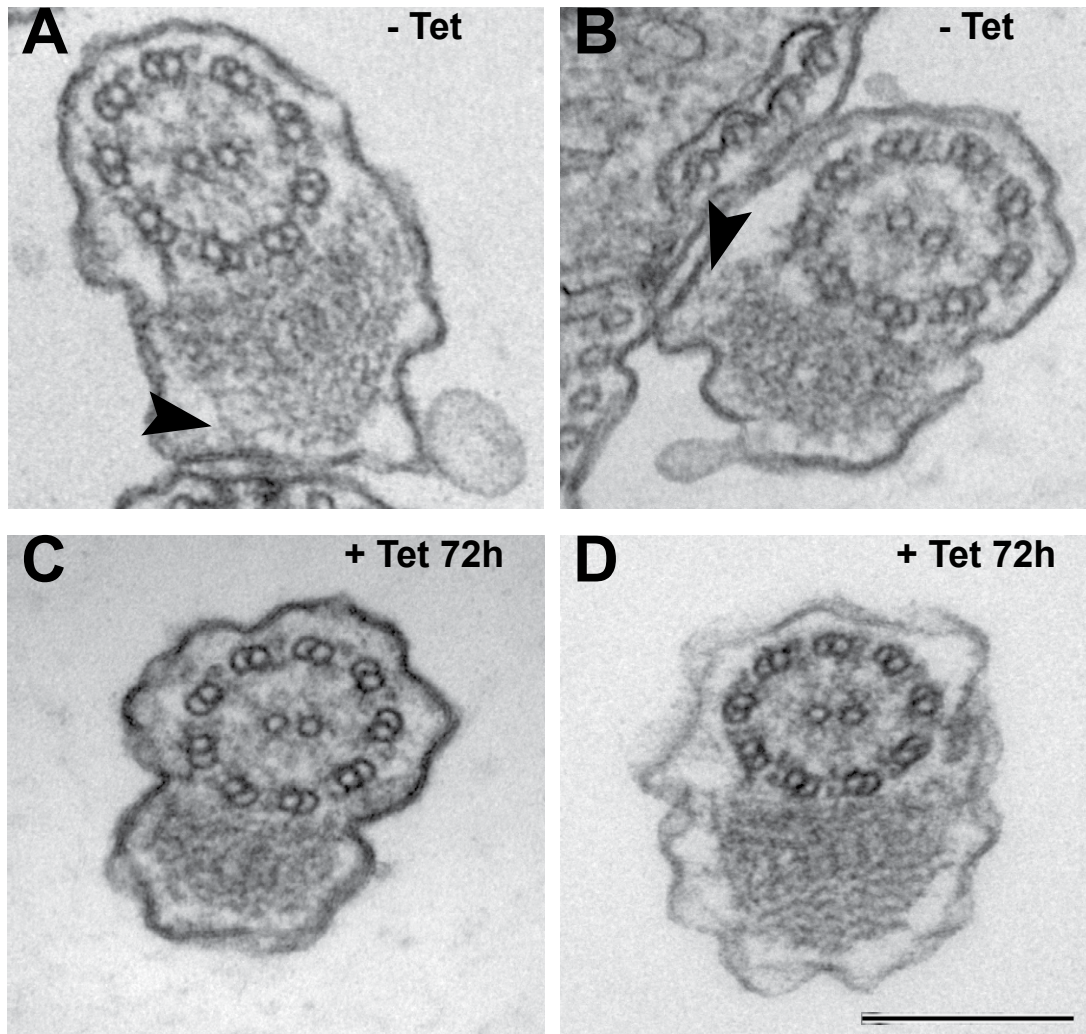

**Fig. S1. FLAM3 is part of the flagellum connectors.** Sections through the flagellum of *FLAM3<sup>RNAi</sup>* cells uninduced (A,B) or induced for 72 hours (C,D) analyzed by transmission electron microscopy. Black arrowheads show the FAZ connectors, fibers apparently connecting the axoneme to the FAZ region.
